# Supplementary material for: Extracellular matrix-based intracortical microelectrodes: Toward a microfabricated neural interface based on natural materials
Source: PubMed Central journal article supplement — Microsyst Nanoeng. Author manuscript; Available in PMC 2018 Nov 27. (PMC6258041; doi:10.1038/micronano.2015.10), 2015-06-29
Supplement: NIHMS967931-supplement-Supplementary.pdf [file NIHMS967931-supplement-Supplementary.pdf]

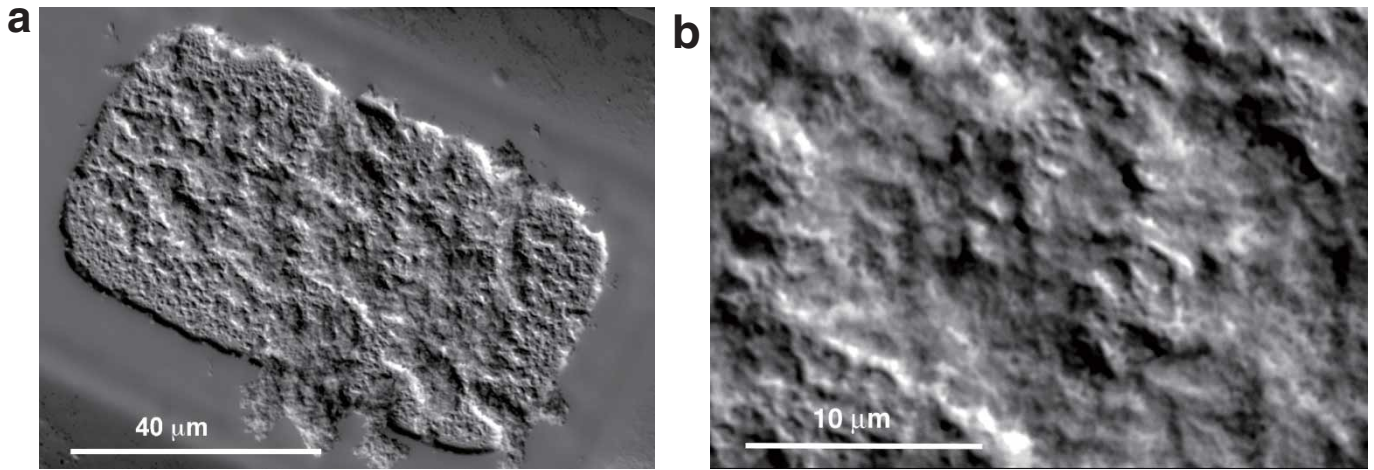

**Figure 51** SEM images of nano-porous Pt-coated MEs recording-sites. (a) An entire 40 × 80 μm ECM-NEs recording site; (b) An enlarged view of the ECM-NEs recording site.

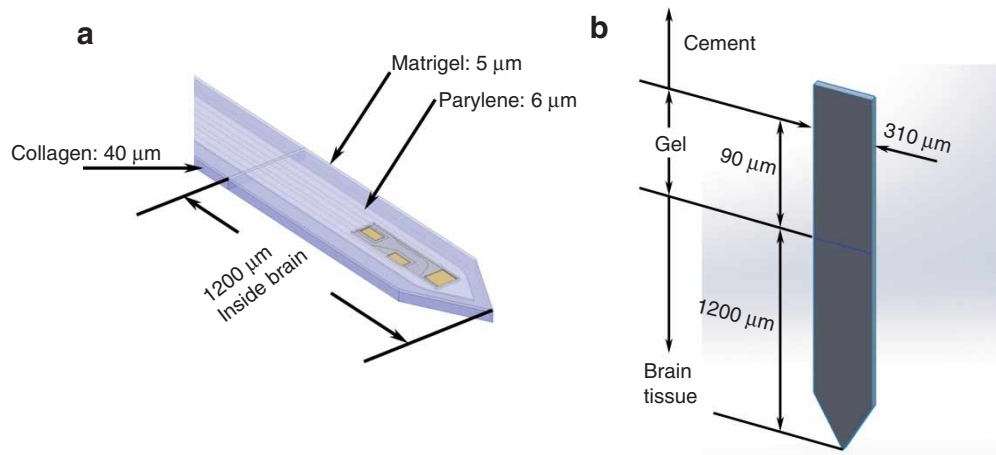

**Figure 52** (a) Detailed geometry and dimensions of the composite ECM-NEs; and (b) geometry and dimensions of the ECM-NEs, PDMS-NEs or Si-NEs.

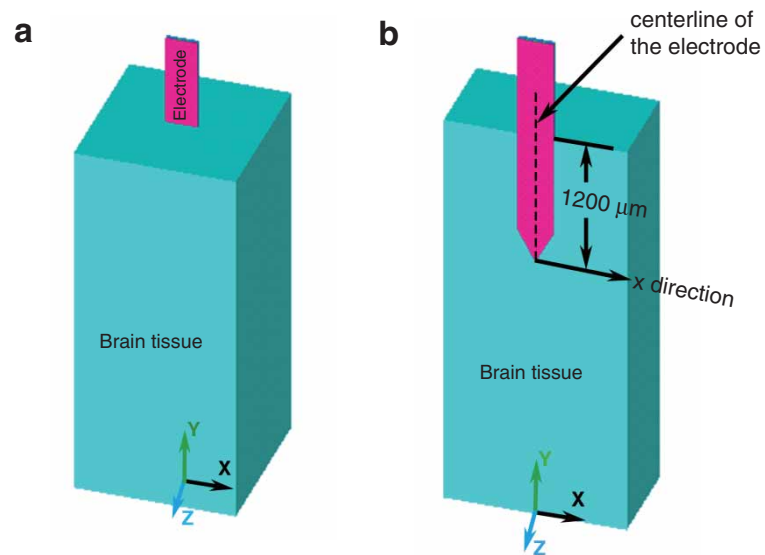

**Figure 53** FEM model of the brain tissue-NE.

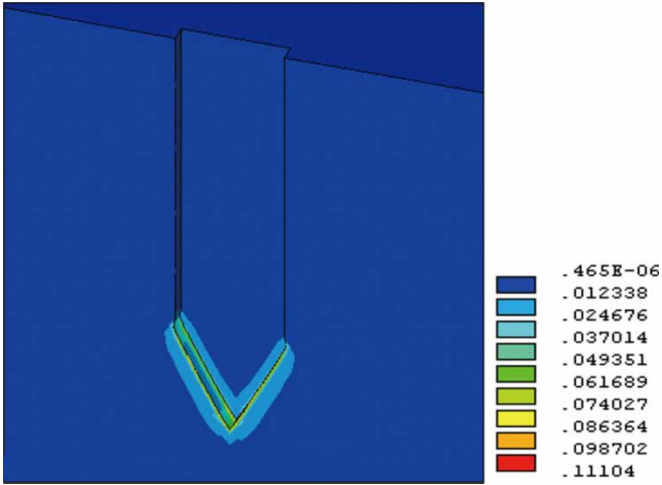

**Figure S4** FEM results showing the von Mises strain distribution in the brain resulting from a 6  $\mu\text{m}$  forward displacement of the ECM-NEs in its axial direction with an electrode-brain coupling coefficient of 0.40.

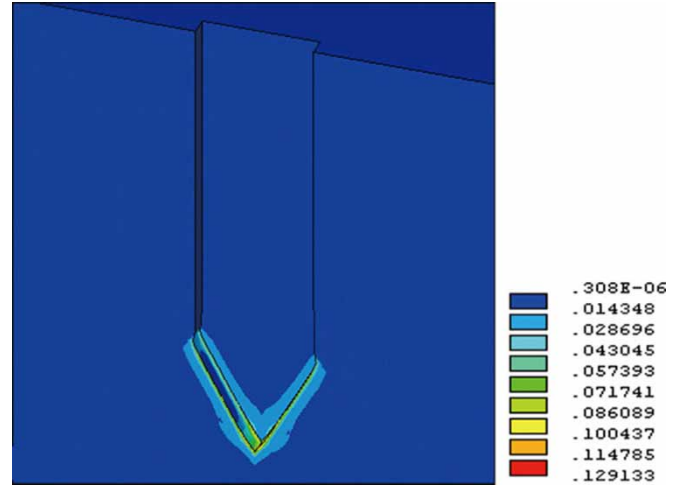

**Figure S5** FEM results showing the von Mises strain distribution in the brain resulting from a 6  $\mu\text{m}$  forward displacement of the ultra-soft PDMS-NEs.

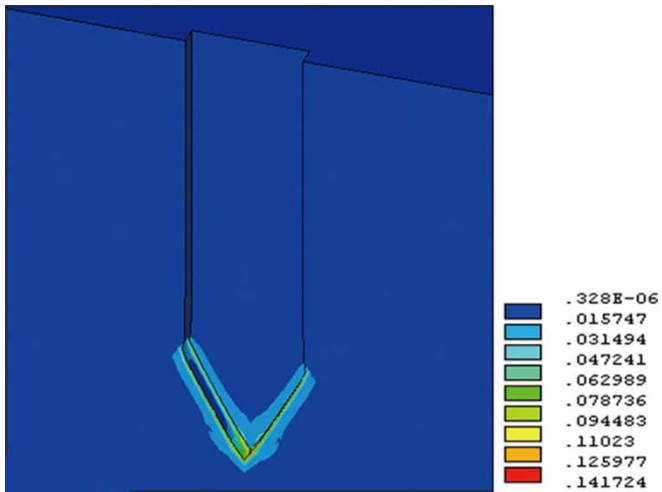

**Figure S6** FEM results showing the von Mises strain distribution in the brain resulting from a 6  $\mu\text{m}$  forward displacement of the stiff Si-NEs.

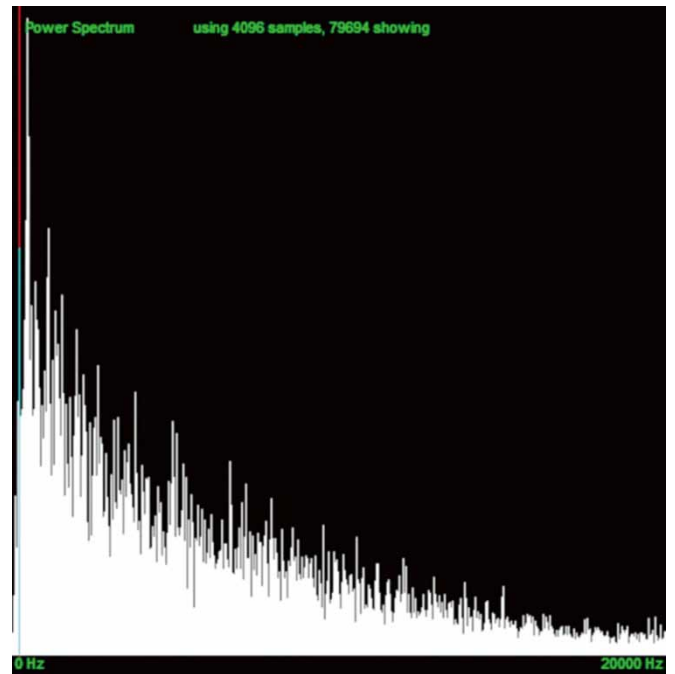

**Figure S7** Power spectrum density of the representative Day 0 neural recording shown in Figure 6a-d.
